# Supplementary material for: Technical feasibility and validation of a coronary artery calcium scoring system using CT coronary angiography images
Source: Springer Nature journal article supplement (doi:10.1007/s00330-015-3940-8), 2015-08-07
Supplement: MOESM1 [file 8322780]

**
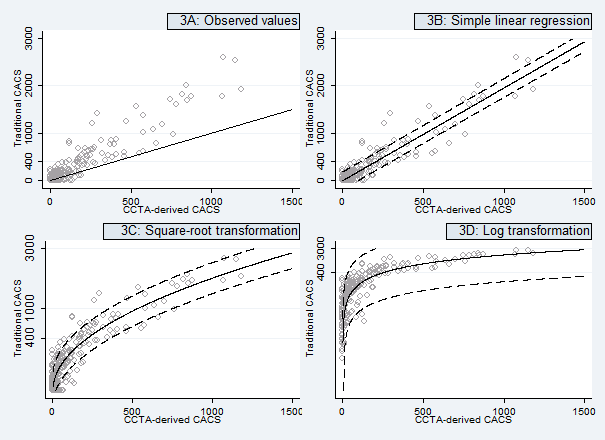
Figure S1: Model derivation.** Underestimation of contrast-enhanced cardiac CT compared with traditionally derived CACS with line of equality **(A)**. The remaining plots display predicted calcium score based on the derivation cohort using simple linear regression **(B)**, linear regression with square-root transformation **(C)** and linear regression with log+1 transformation **(D)** with 95% prediction intervals (dashed lines)

|  | **Predicted CACS (95% prediction interval)** | | |
| --- | --- | --- | --- |
| **Raw CTCA score** | **Linear model**  CACS=2.19×CTCA | **Linear model with square root transformation**  CACS=(1.372 × √CTCA)2 | **Linear model with log+1 transformation**  CACS=(CTCA+1)1.080-1 |
| **CTCA=10** | 22 (-167 to 206) | 19 (2 to 104) | 12 (0 to 123) |
| **CTCA=50** | 110 (-89 to 285) | 94 (15 to 242) | 69 (7 to 650) |
| **CTCA=100** | 219 (9 to 383) | 188 (62 to 384) | 145 (15 to 1365) |
| **CTCA=200** | 438 (205 to 579) | 376 (182 to 639) | 307 (32 to 2881) |
| **CTCA=300** | 657 (400 to 775) | 565 (319 to 880) | 475 (50 to 4465) |
| **CTCA=400** | 876 (596 to 972) | 753 (463 to 1112) | 648 (68 to 6095) |
| **CTCA=800** | 1752 (1374 to 1761) | 1506 (1078 to 2005) | 1369 (144 to 12919) |

**Table S1. Predicted (95% confidence interval for prediction) coronary calcium scores from CTCA using three models.** The simple linear regression model provided the best fit at lower calcium scores and was chosen as the most parsimonious model. **(CTCA,** Computed tomography coronary angiography; **CACS,** coronary artery calcium score)
